# Supplementary material for: Genome-Wide Identification, Characterization and Expression Pattern Analysis of the γ-Gliadin Gene Family in the Durum Wheat (Triticum durum Desf.) Cultivar Svevo
Source: MDPI journal article supplement (doi:10.3390/genes12111743), 2021-10-29
Supplement: s1 [file s1]

**Table S3.** Percentage of glutamine, proline and essential amino acids in the  $\gamma$ -gliadin proteins deduced from the seven full-length genes identified in the durum wheat cv. Svevo. Percentages were calculated using Expasy ProtParam tool [21].

|                                  | <b>Gln</b> | <b>Pro</b> | <b>His</b> | <b>Ile</b> | <b>Leu</b> | <b>Lys</b> | <b>Met</b> | <b>Thr</b> | <b>Phe</b> | <b>Trp</b> | <b>Val</b> | <b>Total<br/>essential<br/>amino acids</b> |
|----------------------------------|------------|------------|------------|------------|------------|------------|------------|------------|------------|------------|------------|--------------------------------------------|
| <b>Gli-<math>\gamma</math>1a</b> | 32.7       | 17.1       | 1.2        | 5.9        | 6.9        | 0.9        | 2.2        | 3.7        | 5.6        | 0.3        | 4.4        | 31.1                                       |
| <b>Gli-<math>\gamma</math>3a</b> | 30.5       | 16.1       | 1.1        | 6.0        | 6.7        | 0.7        | 2.8        | 3.2        | 5.3        | 0.4        | 4.9        | 31.1                                       |
| <b>Gli-<math>\gamma</math>4a</b> | 30.5       | 16.1       | 1.1        | 6.3        | 6.7        | 0.7        | 2.8        | 2.8        | 5.3        | 0.4        | 4.9        | 31.0                                       |
| <b>Gli-<math>\gamma</math>1b</b> | 29.1       | 16.6       | 2.3        | 6.0        | 7.0        | 1.0        | 2.3        | 4.6        | 5.3        | 0.3        | 4.0        | 32.8                                       |
| <b>Gli-<math>\gamma</math>2b</b> | 29.4       | 16.2       | 1.4        | 6.1        | 7.8        | 1.0        | 2.4        | 3.4        | 5.1        | 0.7        | 4.4        | 32.3                                       |
| <b>Gli-<math>\gamma</math>3b</b> | 34.1       | 15.9       | 1.5        | 6.1        | 7.9        | 0.9        | 2.1        | 3.7        | 4.9        | 0.9        | 3.7        | 31.7                                       |
| <b>Gli-<math>\gamma</math>5b</b> | 30.2       | 15.1       | 1.4        | 6.9        | 8.2        | 1.4        | 2.1        | 3.1        | 4.5        | 0.7        | 5.5        | 33.8                                       |
