# Supplementary material for: Genome-Wide Identification, Characterization and Expression Pattern Analysis of the γ-Gliadin Gene Family in the Durum Wheat (Triticum durum Desf.) Cultivar Svevo
Source: MDPI journal article supplement (doi:10.3390/genes12111743), 2021-10-29
Supplement: s1 [file s1]

**Table S4.** Classification of  $\delta$ -gliadin genes, identified in different durum and bread wheat cvs., orthologous to the Svevo *Gli- $\delta 1a^*$* , *Gli- $\delta 2a^*$*  and *Gli- $\delta 1b^*$*  genes. The gene sequences of bread wheat cvs. were retrieved from the Wheat URGI database (<https://wheat-urgi.versailles.inra.fr/>), whereas those of durum wheat cvs. other than Svevo were retrieved from the Ensembl Plants database (<https://plants.ensembl.org/index.html>).

| Cultivar                | $\delta$ -gliadin genes             |            |                                     |            |                                     |            |
|-------------------------|-------------------------------------|------------|-------------------------------------|------------|-------------------------------------|------------|
|                         | <i>Gli-<math>\delta 1a^*</math></i> |            | <i>Gli-<math>\delta 2a^*</math></i> |            | <i>Gli-<math>\delta 1b^*</math></i> |            |
|                         | Gene                                | Pseudogene | Gene                                | Pseudogene | Gene                                | Pseudogene |
| <i>Durum wheat cvs.</i> |                                     |            |                                     |            |                                     |            |
| Svevo                   |                                     | ✓          |                                     | ✓          |                                     | ✓          |
| Cappelli                |                                     | ✓          |                                     | ✓          |                                     | ✓          |
| Strongfield             |                                     | ✓          |                                     | ✓          |                                     | ✓          |
| <i>Bread wheat cvs.</i> |                                     |            |                                     |            |                                     |            |
| Chinese Spring          |                                     | ✓          |                                     | ✓          | ✓                                   |            |
| Cadenza                 |                                     | ✓          |                                     | ✓          |                                     | ✓          |
| Claire                  |                                     | ✓          |                                     | ✓          |                                     | ✓          |
| Jagger                  |                                     | ✓          |                                     | ✓          | ✓                                   |            |
| Julius                  |                                     | ✓          |                                     | ✓          |                                     | ✓          |
| Lancer                  |                                     | ✓          |                                     | ✓          |                                     | ✓          |
| Landmark                | ✓                                   |            |                                     | ✓          |                                     | ✓          |
| Mace                    | ✓                                   |            |                                     | ✓          | ✓                                   |            |
| Paragon                 |                                     | ✓          |                                     | ✓          |                                     | ✓          |
| Robigus                 | ✓                                   |            |                                     | ✓          |                                     | ✓          |
| Stanley                 |                                     | ✓          |                                     | ✓          |                                     | ✓          |
| Weebill                 |                                     | ✓          |                                     | ✓          | ✓                                   |            |
