# Supplementary material for: Genome-Wide Identification, Characterization and Expression Pattern Analysis of the γ-Gliadin Gene Family in the Durum Wheat (Triticum durum Desf.) Cultivar Svevo
Source: MDPI journal article supplement (doi:10.3390/genes12111743), 2021-10-29
Supplement: s1 [file s1]

**Figure S3.** Alignment of the amino acid sequences deduced from the pseudogenes encoding  $\gamma$ -gliadins **(a)** and  $\delta$ -gliadins **(b)**. Roman numerals indicate conserved domains as assigned by Anderson and coworkers [31]. The eight conserved cysteine residues are indicated with an asterisk, the first premature stop codon is indicated with a red circle. The heptapeptide motif PQQFPQ is highlighted in bold and underlined. The alignments were performed using Vector NTI Suite software (version 9.0; Thermo Fisher Scientific, Waltham, MA, USA).

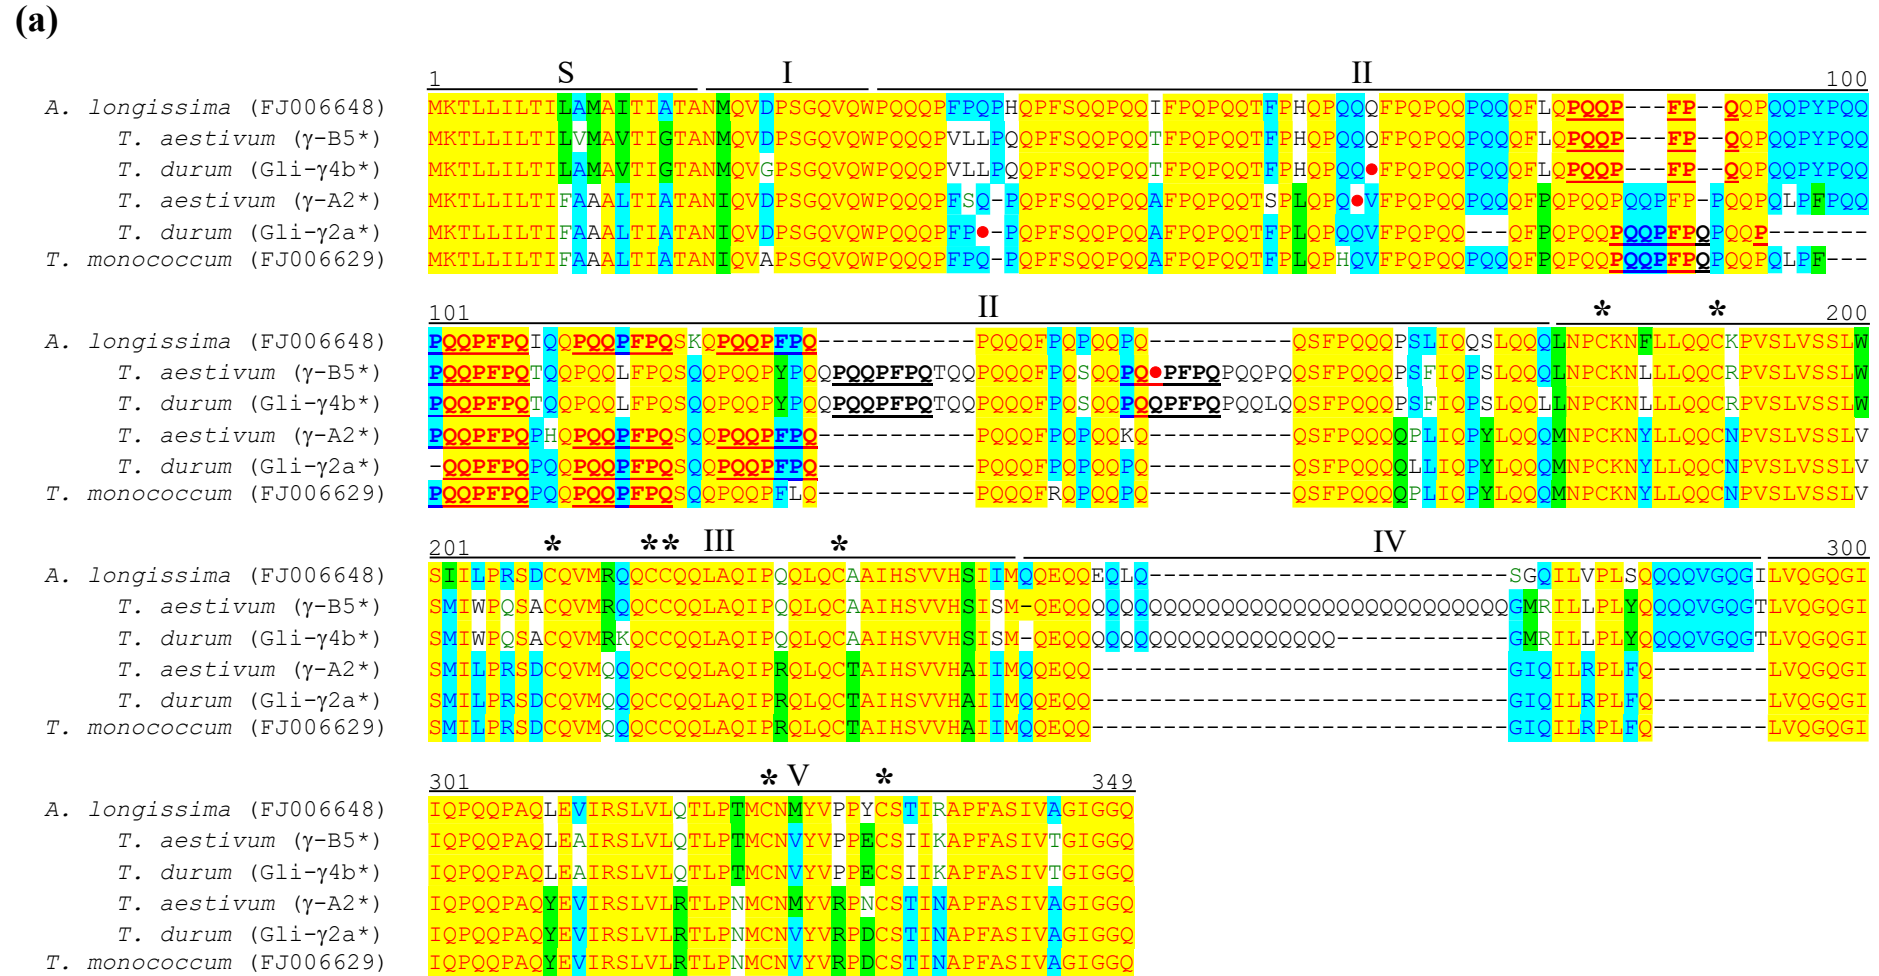

(b)

|                                 |                                                                                            |   |   |    |                           |
|---------------------------------|--------------------------------------------------------------------------------------------|---|---|----|---------------------------|
|                                 | 1                                                                                          | S | I | II | 100                       |
| <i>γ</i> -3-hordein (JQ867080)  | MKIFILFSLLGVATITTTTMOFNPSGLELERPQQLFPQWQPLPQQPPFLQQEPEQFPYPQQ                              |   |   |    | Q-PLPQQQPFPPQQPQLPHQHQQFP |
| <i>T. aestivum</i> (δ-A2*)      | MKIFILVFALLVATTISITATAQLDPSVHDLERPHQSEFPQQQPLPPLQPFPPQEP●QEFPLQ                            |   |   |    | Q-PLPQQQPFPPQQPQLPHQHQQFP |
| <i>T. durum</i> (Gli-δ2a*)      | MKIFILVFALLVATTISTTGTATAQLDPSVHDLERPHQSEFPQQQPLPPLQPFPPQEP●QEFPLQ                          |   |   |    | Q-PLPQQQPFPPQQPQLPHQHQQFP |
| <i>T. aestivum</i> (δ-B1)       | MKILLVFALLVSVSTTITTAIVQLDPSVHVQERPPQSEFLQQQPLTQQQPLPLQEPQQQELFPQKEPQQPFSLQQPQPQEQQFPYPQQ   |   |   |    | Q-PLPQQQPFPPQQPQLPHQHQQFP |
| <i>T. durum</i> (Gli-δ1b*)      | MKIFILVFALLVSVSTTITTAIVQLDPSVHVQERPPQSEFPQQQPLTQQQPFPLQEPQQQELFPQKEPQQPFLSLQQPQPQEQQFPYPQQ |   |   |    | Q-PLPQQQPFPPQQPQLPHQHQQFP |
| <i>T. durum</i> (Gli-δ1a*)      | MKIFILVFALLVSVSTIITTTATVQLDPSIHVQERPPQSEFPQQQPLNQQQPFPLQEPQQQELFPQQ                        |   |   |    | Q-PLPQQQPFPPQQPQLPHQHQQFP |
| <i>T. aestivum</i> (δ-A1*)      | MKIFILVFALLVSVSTIITTTATAQLDPSIHVQERPPQSEFPQQQPLTQQQPFPLQEPQQQELFPQQ                        |   |   |    | Q-PLPQQQPFPPQQPQLPHQHQQFP |
| <i>T. monococcum</i> (JX081266) | MKIFILVFALLVSVSTIITTTATTQLDPSIHVQERPPQSEFPQQQPLTQQQPFPPQEPQQQELFPQQ                        |   |   |    | Q-PLPQQQPFPPQQPQLPHQHQQFP |

|                                 |                                                                                                        |    |   |   |     |
|---------------------------------|--------------------------------------------------------------------------------------------------------|----|---|---|-----|
|                                 | 101                                                                                                    | II | * | * | 200 |
| <i>γ</i> -3-hordein (JQ867080)  | QQLPQQQFPQQMPLQ-----F-----QQQPQFPQCKFFGQYQQPLTQQPYPQQQPIAQQQPSLEEQHQLNLCKEFLLQQCTLEKVPPLLSVLSFIRPHI    |    |   |   |     |
| <i>T. aestivum</i> (δ-A2*)      | QQPQQQFP-----QQQTFPQP--HQQPQFPKQFPFYQYQQPFTQQP-PKEQPIAQQQPCVEERQRLNLCKEFLLQQCNPEEKVSSLHSMIPFL-PKT      |    |   |   |     |
| <i>T. durum</i> (Gli-δ2a*)      | QQPQQQFP-----QQQTFPQP--HQQPQFPKQFPFYQYQQPFTQQP-PKEQPIAQQQPCVEERQRLNLCKEFLLSQCNPEEKVSSLHSMIPFL-PKT      |    |   |   |     |
| <i>T. aestivum</i> (δ-B1)       | QQPQQQFPQQMPLPYEQQTFPQ-QQQQFPQFPQQQFPFYQYQQPLTQQPYPQEQPLPQQQPSVEEKQQLNLCKEFLLQQCNPEEKLSLISVIFFLRPKT    |    |   |   |     |
| <i>T. durum</i> (Gli-δ1b*)      | QQPQQQFPQQMPLPYEQQTFPL-QQQRQFPQFPQFPFYQYQQPLTQQPYPQEQPLPQQQPSMEEKQQLNLCKEFLLQQCNPEEKLSLLQSVIFFLRPKT    |    |   |   |     |
| <i>T. durum</i> (Gli-δ1a*)      | ●QPPQQQFPQQMPLPYQQQIFP-----QQQP--PQQQFPFYQYQQPLTQQPYPQEQPLPQQQPSVEENQQLNLCKEFLLQQCNPEEKLSLLQSVIFFLRPKT |    |   |   |     |
| <i>T. aestivum</i> (δ-A1*)      | QQPQQQFP●-MPLPHQQQIFPQ-----QQQP--PQQQFPFYQYQQPLTQQPYTREQLPQQQPSVEENQQLNLCKEFLLQQCNPEEKVSSLQSMIPFLRPKT  |    |   |   |     |
| <i>T. monococcum</i> (JX081266) | QQLPQQQFPQQMPLPHQQQIFP-----QQQP--PQQQFPFYQYQQPLTQQPYPQEQPLPQQQPSVEENQQLNLCKEFLLQQCNPEEKLSLLQSVIFFLRPKT |    |   |   |     |

|                                 |                                                                                                      |   |    |     |   |    |     |
|---------------------------------|------------------------------------------------------------------------------------------------------|---|----|-----|---|----|-----|
|                                 | 201                                                                                                  | * | ** | III | * | IV | 300 |
| <i>γ</i> -3-hordein (JQ867080)  | SQQNSCQLKRQCCQQLANINEQSRCPAIIQTIVHAIIMQQQ--QVQVQVDHGFVQSLLQQLGQGMPILQQQPGQAFVLPQQQAQFKVVGSLVVIQTLP   |   |    |     |   |    |     |
| <i>T. aestivum</i> (δ-A2*)      | SQQNSCQLKRQECQQLAHIREQS-CLAIQSPVHAIIVQQQRRQ--QVDRGFQGPQPPQLGQGMPMQPQ-PLGQGFILPQQLAQFKLVRSIAIQILP     |   |    |     |   |    |     |
| <i>T. durum</i> (Gli-δ2a*)      | SQQNSCQLKRQECQQLAHIREQS-CPAIQSPVHAIIVQQQRRQ--QVDRGFQGPQPPQLGQGMPMQPQ-PLGQGFILPQQLAQFKLVRSIAIQILP     |   |    |     |   |    |     |
| <i>T. aestivum</i> (δ-B1)       | SQQNSCQLKRRLCCQQLARINEPSRCPAIHNIVHAIIMQQQ-----HVDRGFQGPQPPQLGQGMPMQPQYQLGQGFIPLPQQLAQFKLVRLVVIQTLP   |   |    |     |   |    |     |
| <i>T. durum</i> (Gli-δ1b*)      | SQQNSCQLKRRLCCQQLAHINEPSRCPAIHNIVHAIIMVQQ-----HVDRGFQGPQPPQLGQGMPMQPQYQLGQGFIPLPQQLAQFKLVRLVVIQTLP   |   |    |     |   |    |     |
| <i>T. durum</i> (Gli-δ1a*)      | SQQNNCQLKRQCCQQLAHISEPSRCPAIHNIVHAIIMQQQ--QQQDQVDRGFVQPPQPPQLGQGMPMQPQHQLGQGLSLPQQLAQFKLVRLVVIQTLP   |   |    |     |   |    |     |
| <i>T. aestivum</i> (δ-A1*)      | SQQNNCQLKRQCCQQLAHISEPSRCPAIHNIVHAIIMQQQ-----QHVDRGFVQPPQPPQLGQGMPMQPQHQLGQGLSLPQQLAQFKLVRLVVIQTLP   |   |    |     |   |    |     |
| <i>T. monococcum</i> (JX081266) | SQQNNCQLKRQCCQQLAHISEPSRCPAIHNIVHAIIMQQQ--QQQH--HVDRGFVQPPQPPQLGQGMPMQPQHQLGQGLSLPQQLAQFKLVRLVVIQTLP |   |    |     |   |    |     |

|                                 |                              |   |   |     |
|---------------------------------|------------------------------|---|---|-----|
|                                 | 30*                          | * | V | 328 |
| <i>γ</i> -3-hordein (JQ867080)  | MLCNVHVPYCS----PFGSMATGSGGQ  |   |   |     |
| <i>T. aestivum</i> (δ-A2*)      | MLCNVHVPSDCYTITAYFGSMTACSCGQ |   |   |     |
| <i>T. durum</i> (Gli-δ2a*)      | MLCNVHVPSDCYTITAYFGSMTACSCGQ |   |   |     |
| <i>T. aestivum</i> (δ-B1)       | MLCNVHVPSDCYTTSAPFGSMTAMNGGQ |   |   |     |
| <i>T. durum</i> (Gli-δ1b*)      | MLCNVHVPSDCYTTSAPSGSMTALNGGQ |   |   |     |
| <i>T. durum</i> (Gli-δ1a*)      | MLCNVHVPSDCYTISAPFGGITAYNSGQ |   |   |     |
| <i>T. aestivum</i> (δ-A1*)      | MLCNVHVPSDCYTISAPFGGITAYNGGQ |   |   |     |
| <i>T. monococcum</i> (JX081266) | MLCNVHVPSDCYTISAPFGGITAYNGGQ |   |   |     |
