# Supplementary material for: Genome-Wide Identification, Characterization and Expression Pattern Analysis of the γ-Gliadin Gene Family in the Durum Wheat (Triticum durum Desf.) Cultivar Svevo
Source: MDPI journal article supplement (doi:10.3390/genes12111743), 2021-10-29
Supplement: s1 [file s1]

**Figure S2.** Alignment of the  $\gamma$ -gliadin **(a)** and  $\delta$ -gliadin **(b)** gene sequences from the durum wheat cv. Svevo. The premature stop codons are boxed in red, the TGC codon that encodes the extra cysteine in the *Gli- $\gamma$ 1b* is boxed in blue, the region of Domain IV rich in glutamine codons is boxed in green.

**(a)**

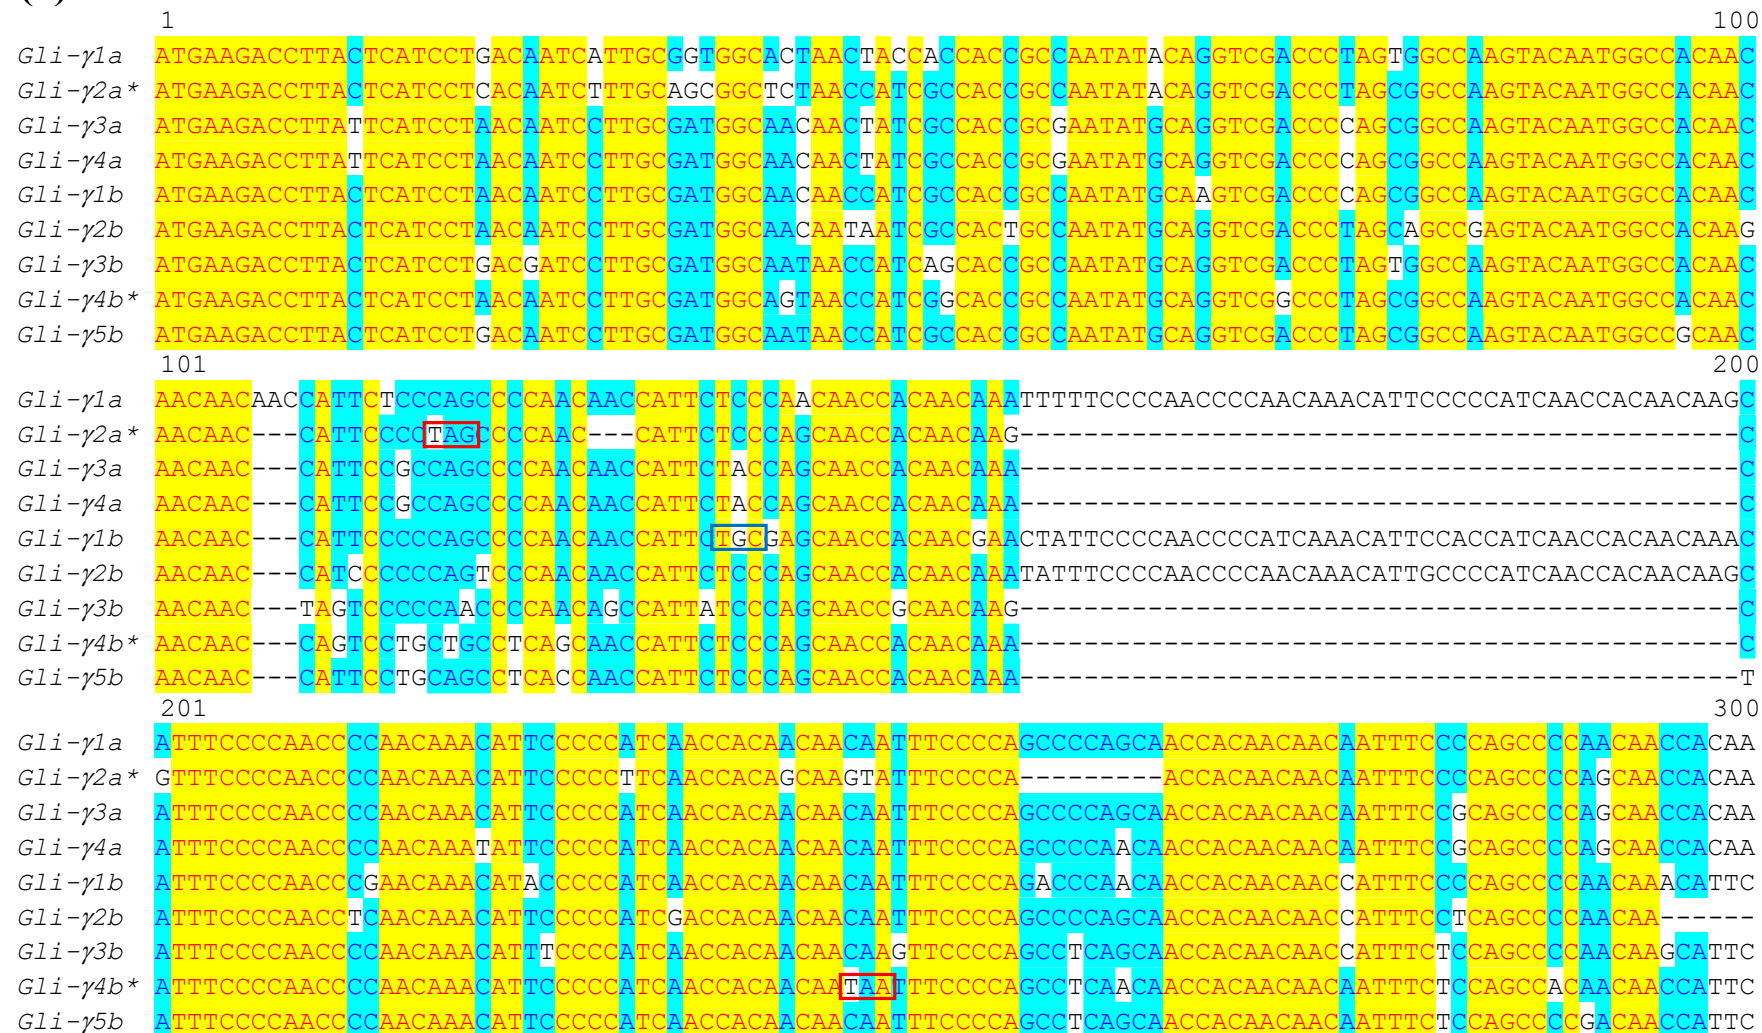

301 400

*Gli-γ1a* CAACCATTTCCCCAGCAACCAACAACAATTTCCCCGGC-----CCCAACAACCACAACAACCAATTCCCCCAGC-----CCCAACAACCCCAAC

*Gli-γ2a\** CAACCATTTCCCCAGC-----CCCAACAACCCCAAC

*Gli-γ3a* CAACCATTTCCCAAC-----CCCAACAAGCCCAAC

*Gli-γ4a* CAACCATTTCCCCAGC-----CCCAACAAGCCCAAC

*Gli-γ1b* CCCAACAAACCCCAACTACCATTTC-----CCCAACAACCCCAAC

*Gli-γ2b* -----CCCAACTACCATTTC-----CCCAACAACCAACAAC

*Gli-γ3b* CCCAACAAACCAACCAACCATTCTCAGACTCAACAACCACAACAACCATTCCCCCAGCAACCACAACAACCAATCCCCCAGACTCAACAACCCCAACAACCTATTTCCCCCAGTCTCAACAACCAACAAC

*Gli-γ4b\** CCCAACAAACCAACCAACCATTCCCCCAGACTCAACAACCCCAACAACCTATTTCCCCCAGTCCCAGCAACCAACAAC

*Gli-γ5b* CCCAACAAACCAACCAACCATTCCCA-----

401 500

*Gli-γ1a* TACCATTTC-----GCAACAACCAACAACCAATTCCCCCAGCCTCAACAACCCCAACAACCAATTTCCCAGTTACAGCAACCAACAACCTTTTACC

*Gli-γ2a\** AACCATTCCCCCAGCCCTCAACAACCCCAACAACCAATTCCCCCAGTCAAGCAACCAACAACCTTTCCCCAG-----CCCAACAACAAATTTCC

*Gli-γ3a* TACCATTTC-----TCAACAACCAACAACCAATTCCCCCAGCCTCAACAACCCCAACAACCAATTTCCCCAGTCAAGCAACCAACAACCTTTTCC

*Gli-γ4a* TACCATTTC-----TCAACAACCAACAACCAATTCCCCCAGCCTCAACAACCCCAACAACCAATTTCCCCAGTCAAGCAACCAACAACCTTTTCC

*Gli-γ1b* AACCATTCCCCCAGCCCTCAGCAACCCCAACAACCAATTCCCCCAGTCAACAACCAACAACCTTTCCCCAG-----CCCAACAACAAATTTCC

*Gli-γ2b* AACCATTCCCCCAGCCCTCAACAACCCCAACAACCAATTCCCCCAGTCAAGCAACCAACAACCTTTCCCCAG-----CCCAACAACAAATTTCC

*Gli-γ3b* AACCATTTCCT-----CAGCAACCAACAACCAATTCCCCCAGACTCAACAACCAACAACCAATTTCCCCAGTTCAGCAACCAACAACCTTTTCC

*Gli-γ4b\** AACCATTTCCT-----CAGCAACCAACAACCAATTCCCCCAGACTCAACAACCCCAACAACCAATTTCCCCAATCCAGCAACCAACAACCAATTTCC

*Gli-γ5b* -----GCAACCAACAACCGTTCCCCCAGACTCAACAACCCCAACAACCAATTTCCCCAGTCCAAGCAACCAACAACCTTTTCC

501 600

*Gli-γ1a* CCAGCCCCAACAAAT-----CGCAACAACCATTCCTCCAGCAACAACAATCATTGATTAGCCATACCTACAACAACAGATGAAC

*Gli-γ2a\** GCAGCCCCAACAAAC-----CGCAACAATCATTCCCCAGCAGCAACAACCTGTTGATTAGCCATATCTACAACAACAGATGAAC

*Gli-γ3a* CCAGCCCCAACAAAC-----CGCAACAATCATTCCCCAGCAACAACCCGTTGATTAGCCATATCTACAACAACAGATGAAC

*Gli-γ4a* CCAGCCCCAACAAAC-----CGCAACAATCATTCCCCAGCAACAACCCGTTGATTAGCCATATCTACAACAACAGATGAAC

*Gli-γ1b* GCAGCCCCAACAAAC-----CACAACAATCATTCCCCCAACAACAACCCGGCGATTAGCTCATTCTACAACAACAGATGAAC

*Gli-γ2b* GCAGCCCCAACAAAC-----CACAACAATCATTCCCCCAACAACAACATGGATGATTAGCTCATTCTACAACAACAGATGAAC

*Gli-γ3b* CCAGCCCCAACAAACAATTCGCGAGCCCCAACAAACCGCAACAATCATTCCTCCAGCAACAACGACCATTATTAGCCATCTCTACAACAACGTTTGAAC

*Gli-γ4b\** CCAACCCCCAACAAAC-----TGCAACAATCATTCCCCAGCAACAACCATCGTTATTAGCCATCTCTACAACAACGCTGAAC

*Gli-γ5b* CCAGCCCCAACAAAC-----CGCAACAATCATTCCCCCAACAACAACCATATTGATTCAACAATCTCTACAACAACAGTGAAC

601 700

*Gli-γ1a* CCTGCAAGAATTACCTCTTGCAAGCAATGCAACCCTGTGTCATTGGTGTGTCATCCCTCGTGTCAATGATCTTGCCACGAAGTGATTGCCAGGTGATGCGGC

*Gli-γ2a\** CCTGCAAGAATTACCTCTTGCAAGCAATGCAACCCTGTGTCATTAGTGTGTCGTCCTCGTGTCAATGATCTTGCCACGAAGTGATTGCCAGGTGATGCAGC

*Gli-γ3a* CCTGCAAGAATTACCTCTTGCAAGCAATGCAACCCTGTGTCATTGGTGTGTCATCCCTCGTGTCAATGATCTTGCCACGAAGTGATTGCCAGGTGATGCAGC

*Gli-γ4a* CCTGCAAGAATTACCTCTTGCAAGCAATGCAACCCTGTGTCATTGGTGTGTCATCCCTCGTGTCAATGATCTTGCCACGAAGTGATTGCCAGGTGATGCAGC

*Gli-γ1b* CCTGCAAGAATTTCTCTTGCAAGCAATGCAACCCTGTGTCATTGGTGTGTCATCTCTCGTGTCAATAATTTTGCCACGAAGTGATTGCCAGGTGATGCAGC

*Gli-γ2b* CCTGCAAGAATTTCTCTTGCAAGCAATGCAACCCTGTGTCATTGGTGTGTCATCTCTCGTGTCAATAATCTTGCCACGAAGTGATTGCCAGCTGATGCAGC

*Gli-γ3b* CCAATGCAAGAATATCTCTTGCAACAATGCAACCCTGCGTCATTGGTGTGTCATCCCTCTGGTGCATAATCTGGCCACAAGCGATTGCCAAGTGATGCAGC

*Gli-γ4b\** CCAATGCAAGAATTTACTCTTGCAAGCAATGTAGACCTGTGTCATTGGTCTCATCCCTCTGGTGCATAATGATCTGGCCACAAGCGCTTGCCAAGTGATGAGGA

*Gli-γ5b* CCAATGCAAGAATTTCTCTTGCAAGCAATGCAACCCTGTGTCCTGGTGTGTCATCCCTCTGGTGCATAATCATCTTGCCACCAAGCGATTGCCAGGTGATGCGG

|                 |                                                                                                            |  |      |
|-----------------|------------------------------------------------------------------------------------------------------------|--|------|
|                 | 701                                                                                                        |  | 800  |
| <i>Gli-γ1a</i>  | AACAATGTTGCCAACAACCTAGCACAGATTTCCTCAGCAGCTCCAGTGCAGCCATCCATGGTGTGCTGCATTCCATCATCATGCAGCAAGAACAACAACA       |  |      |
| <i>Gli-γ2a*</i> | AACAATGTTGCCAACAACCTAGCACAGATTTCCTCAGTGTGCTGCATTCCATCATCATGCAGCAAGAACAAC---A                               |  |      |
| <i>Gli-γ3a</i>  | AACAATGTTGCCAACAACCTAGCACAGATTTCCTCGCCAGCTCCAGTGTGCAGCCATCCATAGCGTGTGCTGCATTCCATCGTCATGCAGCAAGAACAACAACA   |  |      |
| <i>Gli-γ4a</i>  | AACAATGTTGCCAACAACCTAGCACAGATTTCCTCGCCAGCTCCAGTGTGCAGCCATCCATAGCGTGTGCTGCATTCCATCATCATGCAGCAAGAACAACAACA   |  |      |
| <i>Gli-γ1b</i>  | AACAATGTTGCCAACAACCTAGCACAAATTTCCTCAACAGCTCCAGTGCAGCCATCCACAGCGTGTGCTGCATTCCATCATCATGCAACAAGAACAACAACA     |  |      |
| <i>Gli-γ2b</i>  | AACAATGTTGCCAACAACCTAGCACAAATTTCCTCAACAGCTCCAGTGCAGCCATCCACAGCGTGTGCTGCATTCCATCGTCATGCAGCAAGAACAACAACG     |  |      |
| <i>Gli-γ3b</i>  | AACAATGCTGCCAAGAACCTAGCACAGATTTCCTCAGCAGCTCCAGTGCAGCCATCCATAGCGTGTGCTGCATTCCATCATCATGCAGCAGCAACAACAACA     |  |      |
| <i>Gli-γ4b*</i> | AACAATGCTGCCAACAACCTAGCACAGATTTCCTCAGCAGCTCCAGTGTGCAGCCATCCATAGCGTGTGCTGCATTCCATCAGCATGTAGCAAGAACAACAACA   |  |      |
| <i>Gli-γ5b</i>  | AACAATGTTGTCACAACAACCTAGCACAAATTTCCTCAGCAACTCCAGTGTGCAGCCATCCATAGCGTGTGCTGCATTCCATCATCATGCAGCAAGAACAACAAGA |  |      |
|                 | 801                                                                                                        |  | 900  |
| <i>Gli-γ1a</i>  | ACAACAA-----GGCATACAGATCATGCGGCCACTTTTCAGC-----                                                            |  |      |
| <i>Gli-γ2a*</i> | A-----GGCATACAGATCCTGCGACCACTGTTTCAGC-----                                                                 |  |      |
| <i>Gli-γ3a</i>  | A-----GGCATACAGATCCTCGGCCACTGTTTCAGC-----                                                                  |  |      |
| <i>Gli-γ4a</i>  | A-----GGCATACAGATCCTCGGCCACTGTTTCAGC-----                                                                  |  |      |
| <i>Gli-γ1b</i>  | A-----GGCGTGCCGATCCTGCGGCCACTATTTTCAGC-----                                                                |  |      |
| <i>Gli-γ2b</i>  | A-----GGCGTGCGATCCTGCGGCCACTATTTTCAGC-----                                                                 |  |      |
| <i>Gli-γ3b</i>  | ACAACAACAACAACAACAACAACA-----GGCATGCATATCCTGTGTGACACTATCTCAACAACAACAGTTGGGTCAAGGT                          |  |      |
| <i>Gli-γ4b*</i> | ACAACAACAACAACAACAACAACAACAACAACAACAACAACAACAACA-----GGCATGCGTATCCTGTGTGCACTATATCAGCAACAACAGGTGGGTCAAGGT   |  |      |
| <i>Gli-γ5b</i>  | ACAACCTACAG-----SGTGTGCAAAATCCTGGTGCCACTGTCTCAACAGCAACAGGTGGGTCAAGGT                                       |  |      |
|                 | 901                                                                                                        |  | 1000 |
| <i>Gli-γ1a</i>  | ----TCATCCAGGGTCAGGGCATCATCCAACCTCAACAACCAGCTCAATTGGAGGTGATCAGGTCATTGGTATTGGGAACCTCTTCCAACCATGTGCAATG      |  |      |
| <i>Gli-γ2a*</i> | ----TTGTCCAAGGACAGGGCATCATCCAACCTCAACAACCAGCTCAATATGAGGTGATCAGGTCATTGGTATTGAGAACCCTTCCAACCATGTGCAACG       |  |      |
| <i>Gli-γ3a</i>  | ----TCATCCAAGGTCAGGGCATCATCCAACCTCAACAACCAGCTCAATATGAGGTGATCAGGTCATTGGTATTGAGAACCCTTCCAACCATGTGCAACG       |  |      |
| <i>Gli-γ4a</i>  | ----TCGTCCAAGGTCAGGGCATCATCCAACCTCAACAACCAGCTCAATATGAGGTGATCAGGTCATTGGTATTGAGAACCCTTCCAACCATGTGCAACG       |  |      |
| <i>Gli-γ1b</i>  | ----TCGCCCAGGGTCTGGGTATCATCCAACCTCAACAACCAGCTCAATTGGAGGGGATCAGGTCATTGGTATTGAAAACCTCTTCCAACCATGTGCAACG      |  |      |
| <i>Gli-γ2b</i>  | ----TCGCCCAGGGTCTGGGTATCATCCAACCTCAACAACCAGCTCAATTGGAGGGGATCAGGTCATTGGTATTGAAAACCTCTTCCAACCATGTGCAATG      |  |      |
| <i>Gli-γ3b</i>  | ACTCTCGTCCAAGGCCAGGGCATCATCCAACCTCAACAACCTAGCTCAATTGGAGGCGATCAGGTCATTGGTGTGCAAACTCTTCCAACCATGTGCAACG       |  |      |
| <i>Gli-γ4b*</i> | ACTCTCGTCCAAGGCCAGGGCATCATCCAACCTCAACAACCAGCTCAATTGGAGGCGATCAGGTCATTGGTGTGCAAACTCTTCCAACCATGTGCAACG        |  |      |
| <i>Gli-γ5b</i>  | ATTCTCGTCCAAGGGTCAAGGCATCATCCAACCTCAACAACCAGCTCAATTGGAGGTGATCAGGTCATTGGTGTGCAAACTCTTCCAACCATGTGCAACG       |  |      |
|                 | 1001                                                                                                       |  | 1074 |
| <i>Gli-γ1a</i>  | TATTTGTTCACCTGAGTGCTCCACCACCAAGGCACCATTTGCCAGCATAGTTGCCGACATTGGTGGCCAATGA                                  |  |      |
| <i>Gli-γ2a*</i> | TGTATGTCCGACCTGACTGCTCCACCATCAACGCACCATTTGCCAGCATAGTTGCCGGCATTTGGTGGCCAATGA                                |  |      |
| <i>Gli-γ3a</i>  | TGTATGTCCGACCTGACTGCTCCACCATCAACGCACCATTTGCCAGCATAGTCGCCGGCATCAGTGGACAATGA                                 |  |      |
| <i>Gli-γ4a</i>  | TGTATGTCCGACCTGACTGCTCCACCATCAACGCACCATTTGCTAGCATAGTCGCCGGCATCAGTGGACAATGA                                 |  |      |
| <i>Gli-γ1b</i>  | TGTATGTGCCACCTGACTGCTCCACCATCAACGTACCATATGCCAACATAGACGCTGGCATTTGGTGGCCAATGA                                |  |      |
| <i>Gli-γ2b</i>  | TGTATGTGCCACCTGACTGCTCCACCATCAACGTGCCATATGCCAGCATAGACGCTGTTCATTGGTGGCCAATGA                                |  |      |
| <i>Gli-γ3b</i>  | TGTATGTGCCACCTGAGTGCTCCATCATCAGGGCACCATTTTGCCAGCATAGTCGCCGGGATTGGTGGCCAATGA                                |  |      |
| <i>Gli-γ4b*</i> | TGTATGTGCCACCTGAGTGCTCTATCATCAAGGCACCATTTGCCAGCATAGTCACCGGAATTGGTGGCCAATGA                                 |  |      |
| <i>Gli-γ5b</i>  | TGTATGTGCCACCTTACTGCTCCACCATCAGGGCACCATTTTGCTAGCATAGTCGCCAGCATTTGGTGGCCAATGA                               |  |      |

(b)

1 100

Gli- $\delta$ 1a\* ATGAAGATCTTCTTGGTCTTTGCCCTCCTCGTTGTATCAACGATCATCACCACCGCGACCGTGCAGCTCGACCCTAGCATCCATGTACAAGAAAGGCCAC

Gli- $\delta$ 1b\* ATGAAGATCTTCTTGGTCTTTGCCCTCCTCGTTGTATCAACGACCATCACCACCGCGATCGTGCAGCTCGACCCTAGTGTCCATGTCCAAGAAAGGCCAC

Gli- $\delta$ 2a\* ATGAAGATCTTCTTGGTCTTTGCCCTCCTGGTTGCCACAACGATCAGCACCACCGGCACCTGCAGCTCGACCCTAGCGTCCATGACTTAGAAAGGCCAC

101 200

Gli- $\delta$ 1a\* AACAAATCATTTCACAGCAGCAACCACTTAATCAACAACAACCATTCCCCTGCAAGAGCCACAACAACCACTATTCCAGCAA-----

Gli- $\delta$ 1b\* AACAAATCATTTCGAGCAGCAACCACTTACCAGCAACAACCATTCCCCTGCAAGAACCAACAACCACTATTCCCGCAA--AAAGAGCCACAACAACC

Gli- $\delta$ 2a\* ACCAAATCATTTCACAAAGCAGCAGCACTTCCCCTGCTACAACCATTCCCCTGCAAGAGCCATTAACCA---TTTCCGTTG-----

201 300

Gli- $\delta$ 1a\* -----CAACAACCGTATCCACAACAGTCACTTCCCACAACAACACTTCCCAGCAACATTATTTCCTAGCAA

Gli- $\delta$ 1b\* ATTTTTGCTGCAGCAACCACAACCCAGGAACAACAACCATATCCACAACAGCCACTTCTCCAACAACAACACTTCCCAGCAACATCTATTCCCAGCAG

Gli- $\delta$ 2a\* -----CAGCAACCACAACAAC---CTGCAACAACAACCACTTCCCACAACAACATCTATTTCCTAGCAAC

301 400

Gli- $\delta$ 1a\* CCGCGCAACAACAATTTCCACAGCAGATGCCACTTCCGTATCAACAACAAATATTCCCCTCAACAACAACAC---CCCACAACAACAAC

Gli- $\delta$ 1b\* CCACCAACAACAACAATTTCCGAGCAGATGCCACTTCCATATGAACAACAAATATTCCCCTTACAACAGCAACGGCAACCACAATTCCCAGCAACACAAC

Gli- $\delta$ 2a\* CCGCCAACAACAACAATTTCCACAGCA-----ACAACAACATTTCCCCTCAACCTCATCAACA---ACCACAATTCCCGAACAACAAC

401 500

Gli- $\delta$ 1a\* CATTTTACCAATATCAACAACCATTAAACAACAACCATAACCGCAAGAGCAACCATTGCCACAACAACAACCTTCTGTGGAGGAAAACAACAATTGAA

Gli- $\delta$ 1b\* CATTTCCCAATATCAACAACCATTAAACAACAACCATAACCGCAAGAGCAACCATTGCCACAACAACAACCTTCTATGGAGGAAAACAACAATTGAA

Gli- $\delta$ 2a\* CATTTTACCAATATCAACAACCATTAAACAACAACCATAACCGCAAGAGCAACCATTGGCAGCAACAACCTTGTGTAGAGGAAAACAACAAGACTGAA

501 600

Gli- $\delta$ 1a\* CTGTGTGAAGGAGTTTCCTGCTGCAGCAGTGCAACCCGGAGGAGAACTGTGCTATTACTGCAGTCAGTGATCCCGTTCCTCCGACCAAGACCTCGCAACAG

Gli- $\delta$ 1b\* CGTGTGTGAAGGAGTTTCCTCCTGCAACAGTGCAACCCGGAGGAGAACTGTGCTATTACTCCAGTCAGTGATCCCGTTCCTCCGACCAAGACCTCGCAACAG

Gli- $\delta$ 2a\* CTGTGTGAAGGAATTTCCTCTGCAGCAGTGCAACCCGGAGGAGAAAGGTGTGCTACTCCATTCTGGTGATCCCGTTCCTCTGACCAAGACCTCGCAACAG

601 700

Gli- $\delta$ 1a\* AACAACTGCCAGTTGAAGCGGCAACAATGTTGTGCAAACTTGACATATCAGCGAGCCGTCCGATGCCCGAACATCCACAACATTGTGCACGCCATCA

Gli- $\delta$ 1b\* AATAGCTGCCAGTTGAAGCGTCTACAATGTTGTGCAAACTTGACATATCAATGAACCGTCCGATGCCCGGCCATCCACAACATTGTGCACGCCATCG

Gli- $\delta$ 2a\* AATAGCTGCCAGTTGAAGCGACAAGAATGTTGTGCGCAAACTTGACATATCCGTGAGCAGTCTTGATGCCCGGCCATCCAAAGCCCTGTGTGATGCCATCA

701 800

Gli- $\delta$ 1a\* TTATGCAACAACAACAACAACAACAACAACAACAACAACATGTGGATAGAGGTTTGTCCAGCCTCAACC-ACAACAGTTGGGCCAGGGAATGCCCATGC

Gli- $\delta$ 1b\* TCGTTCAACAACAACA-----TGTGGATAGAGGTTTCCGCCAGCCTCAACC-ACAACAGTTGGGCCAGGGAATGCCCATGC

Gli- $\delta$ 2a\* TTGTGCAACAACAACAACAACAACAACAACAACAACA-----GTTGGATAGAGGTTTCCGCCAGCCTCAACCACACAGTTGGGCCAGGGAATGCCCATGC

801 900

Gli- $\delta$ 1a\* AGCCTCAACATCAATTGGGCCAGGGCTTAAGCCTACCTCAACAACCTAGCCCAGTTCAAGTTGGTTAGGTTACTTGTGATTTCAGACCTTGCCTATGTTATG

Gli- $\delta$ 1b\* AGCCTCAATATCAATTGGGCCAGGGCTTTATCCTACCTCAACAACCTAGCCCAGTTCAAGTTGGTTAGGTTACTTGTGATTTCAGACCTTGCCTATGTTATG

Gli- $\delta$ 2a\* AACCTCAATAGCCACTGGGCCAGGGCTTTATCCTACCTCAGCAACCTAGCCCAGTTTAAGTTGGTTAGGTTACTTGTGATTTCAGACCTTGCCTATGTTATG

901 979

Gli- $\delta$ 1a\* CAATGTGCATGTCCCCTCTGATTGCTACACCATTAGTGCACCATTTGGTGGCATCACTGCCTACAACAGTGGACAATGA

Gli- $\delta$ 1b\* CAACGTGCATGTCCCCTCTGATTGCTACACCATTAGTGCACCATTTGGTAGCATGACTGCCTTGAACGGTGGACAGTGA

Gli- $\delta$ 2a\* CAACGTGCATGTCCCCTCTGATTGCTACACCATTAGTGCATATTTGGTAGCATGACTGCCTGCAGCTGTGGACAATGA
