# Supplementary material for: Genome-Wide Identification, Characterization and Expression Pattern Analysis of the γ-Gliadin Gene Family in the Durum Wheat (Triticum durum Desf.) Cultivar Svevo
Source: MDPI journal article supplement (doi:10.3390/genes12111743), 2021-10-29
Supplement: s1 [file s1]

**Table S2.** Manual annotation of the regions from the homeologous A and B genome of the durum wheat cv. Svevo harboring the  $\gamma$ -gliadin genes. The ancestral genes are highlighted in orange.

| A genome                                                   |         |         | B genome                                                   |         |         | Rice           |
|------------------------------------------------------------|---------|---------|------------------------------------------------------------|---------|---------|----------------|
| Annotation                                                 | Start   | End     | Annotation                                                 | Start   | End     |                |
| E3 ubiquitin-protein ligase                                | 4110013 | 4115442 | E3 ubiquitin-protein ligase                                | 4058971 | 4066512 | LOC_Os05g01230 |
| Mei2-like protein                                          | 4118433 | 4125560 | Mei2-like protein                                          | 4069522 | 4076464 | LOC_Os05g01240 |
| Charged multivesicular body protein                        | 4323044 | 4325693 | Charged multivesicular body protein                        | 4189942 | 4192587 | LOC_Os05g01250 |
| Putative LRR receptor-like serine/threonine-protein kinase | 4327378 | 4330809 | Putative LRR receptor-like serine/threonine-protein kinase | 4193737 | 4197062 |                |
| F-box/LRR-repeat protein 14-like                           | 4333931 | 4335661 | B3 domain-containing protein family                        | 4198192 | 4198479 |                |
| Putative LRR receptor-like serine/threonine-protein kinase | 4374088 | 4375420 | F-box/LRR-repeat protein                                   | 4215102 | 4218006 |                |
| Putative LRR receptor-like serine/threonine-protein kinase | 4379443 | 4381974 | Wall-associated receptor kinase                            | 4234355 | 4252395 |                |
| Protein SUPPRESSOR OF GENE SILENCING 3                     | 4392564 | 4396390 | Putative LRR receptor-like protein kinase family protein   | 4262215 | 4264249 |                |
| Uncharacterized protein                                    | 4435606 | 4436067 | Putative LRR receptor-like protein kinase family protein   | 4264292 | 4265965 |                |
| Putative LRR receptor-like serine/threonine-protein kinase | 4441777 | 4444301 | Putative LRR receptor-like protein kinase family protein   | 4274743 | 4278215 |                |
| Putative LRR receptor-like serine/threonine-protein kinase | 4477765 | 4479939 | Putative LRR receptor-like protein kinase family protein   | 4299647 | 4301050 |                |
| Ankyrin-1 like                                             | 4494815 | 4498583 |                                                            |         |         |                |
| F-box/LRR-repeat protein 14-like                           | 4508576 | 4510033 |                                                            |         |         |                |
| Putative LRR receptor-like serine/threonine-protein kinase | 4526143 | 4529573 |                                                            |         |         |                |
| Putative LRR receptor-like serine/threonine-protein kinase | 4538905 | 4541830 |                                                            |         |         |                |
| Carboxyl-terminal peptidase, putative (DUF239)             | 4545278 | 4548303 |                                                            |         |         |                |
| Putative LRR receptor-like serine/threonine-protein kinase | 4572368 | 4575403 |                                                            |         |         |                |

| A genome                                                   |                |                | B genome                                                |                |                | Rice                  |
|------------------------------------------------------------|----------------|----------------|---------------------------------------------------------|----------------|----------------|-----------------------|
| Putative LRR receptor-like serine/threonine-protein kinase | 4593717        | 4597257        |                                                         |                |                |                       |
| Putative LRR receptor-like serine/threonine-protein kinase | 4604918        | 4608389        |                                                         |                |                |                       |
| $\delta$ -gliadin ( <i>Gli-<math>\delta</math>1a*</i> )    | 4613285        | 4614202        | $\gamma$ -gliadin ( <i>Gli-<math>\gamma</math>1b</i> )  | 4313476        | 4314384        |                       |
| $\delta$ -gliadin ( <i>Gli-<math>\delta</math>2a*</i> )    | 4631881        | 4632772        | $\delta$ -gliadin ( <i>Gli-<math>\delta</math>1b*</i> ) | 4341737        | 4342690        |                       |
| $\gamma$ -gliadin ( <i>Gli-<math>\gamma</math>1a</i> )     | 4687840        | 4688874        | $\gamma$ -gliadin ( <i>Gli-<math>\gamma</math>2b</i> )  | 4355195        | 4356088        |                       |
| $\gamma$ -gliadin ( <i>Gli-<math>\gamma</math>2a*</i> )    | 4744130        | 4744969        | $\gamma$ -gliadin ( <i>Gli-<math>\gamma</math>3b</i> )  | 4481997        | 4482992        |                       |
| $\gamma$ -gliadin ( <i>Gli-<math>\gamma</math>3a</i> )     | 4871918        | 4872775        | $\gamma$ -gliadin ( <i>Gli-<math>\gamma</math>4b*</i> ) | 4514026        | 4515024        |                       |
| $\gamma$ -gliadin ( <i>Gli-<math>\gamma</math>4a</i> )     | 4879635        | 4880492        | $\gamma$ -gliadin ( <i>Gli-<math>\gamma</math>5b</i> )  | 4518944        | 4519819        |                       |
| <b>Cyclophilin-like protein</b>                            | <b>4883974</b> | <b>4886532</b> | <b>Cyclophilin-like protein</b>                         | <b>4524929</b> | <b>4527581</b> | <b>LOC_Os05g01270</b> |
| Avenin-like ( <i>Av-1a*</i> )                              | 4887801        | 4888553        | Avenin-like ( <i>Av-1b*</i> )                           | 4528580        | 4529044        |                       |
| Avenin-like ( <i>Av-2a</i> )                               | 4891405        | 4892007        | Avenin-like ( <i>Av-2b</i> )                            | 4543310        | 4543921        |                       |
| <b>Protein of unknown function (DUF3339)</b>               | <b>4892935</b> | <b>4893153</b> | <b>Protein of unknown function (DUF3339)</b>            | <b>4545088</b> | <b>4545306</b> | <b>LOC_Os05g01280</b> |
