# Supplementary material for: Genome-Wide Identification, Characterization and Expression Pattern Analysis of the γ-Gliadin Gene Family in the Durum Wheat (Triticum durum Desf.) Cultivar Svevo
Source: MDPI journal article supplement (doi:10.3390/genes12111743), 2021-10-29
Supplement: s1 [file s1]

**Table S1.** Primer pairs and optimized conditions used in the qRT-PCR, and size of the amplified products.

| Gene                   | Primer orientation | Primer sequence (5'-3') | Product size (bp) | Ta | Tm   | E    | R <sup>2</sup> |
|------------------------|--------------------|-------------------------|-------------------|----|------|------|----------------|
| <i>Gli-γ1a</i>         | Fw                 | ATCATGCGGCCACTTTTC      | 139               | 60 | 83.2 | 2.10 | 0.997          |
|                        | Rev                | AGCACTCAGGTGGAACAAATACA |                   |    |      |      |                |
| <i>Gli-γ3a+Gli-γ4a</i> | Fw                 | CAACTAGCACAGATTCCTCGC   | 145               | 62 | 85.0 | 2.00 | 0.996          |
|                        | Rev                | GTTGGATGATGCCCTGACCT    |                   |    |      |      |                |
| <i>Gli-γ1b</i>         | Fw                 | CGAGCAACCACAACGAACATA   | 79                | 60 | 79.8 | 2.01 | 0.974          |
|                        | Rev                | TTCGGGTTGGGGAAATGT      |                   |    |      |      |                |
| <i>Gli-γ2b</i>         | Fw                 | GTCGACCCTAGCAGCCG       | 79                | 60 | 83.2 | 1.93 | 0.991          |
|                        | Rev                | GTGGTTGCTGGGAGAATGGT    |                   |    |      |      |                |
| <i>Gli-γ3b</i>         | Fw                 | CTCCAGCAACAACGACCA      | 195               | 60 | 84.0 | 2.01 | 0.998          |
|                        | Rev                | CTGGAGCTGCTGAGGAATCT    |                   |    |      |      |                |
| <i>Gli-γ5b</i>         | Fw                 | GTGTCATCCCTCTGGTCAATC   | 249               | 62 | 85.3 | 1.89 | 0.997          |
|                        | Rev                | AGGTTGGATGATGCCTTGA     |                   |    |      |      |                |
| <i>CDC</i>             | Fw                 | CAGCTGCTGACTGAGATGGA    | 227               | 60 | 80.5 | 2.03 | 0.995          |
|                        | Rev                | ATGTCTGGCCTGTTGGTAGC    |                   |    |      |      |                |
| <i>RLI</i>             | Fw                 | TTGAGCAACTCATGGACCAG    | 242               | 60 | 77.8 | 2.19 | 0.996          |
|                        | Rev                | GCTTTCCAAGGCACAAACAT    |                   |    |      |      |                |
| <i>ADP-RF</i>          | Fw                 | TCTCATGGTTGGTCTCGATG    | 276               | 60 | 82.8 | 2.07 | 0.987          |
|                        | Rev                | GGATGGTGGTGACGATCTCT    |                   |    |      |      |                |
