# Supplementary material for: Genome-Wide Identification, Characterization and Expression Pattern Analysis of the γ-Gliadin Gene Family in the Durum Wheat (Triticum durum Desf.) Cultivar Svevo
Source: MDPI journal article supplement (doi:10.3390/genes12111743), 2021-10-29
Supplement: s1 [file s1]

**Figure S4.** Alignment of the amino acid sequences deduced from the  $\gamma$ -gliadin genes of the cv. Svevo and other durum wheat cvs. The  $\gamma$ -gliadin gene sequences from the different durum wheat cvs. were retrieved from the GenBank database. The Roman numerals indicate conserved domains as assigned by Anderson and coworkers [31]. The first premature stop codon is indicated with a red circle, the eight conserved cysteine residues are indicated with black asterisks, the extra cysteine residue is boxed in red. The heptapeptide motif **PQQPFPQ** is highlighted in bold and underlined. The alignments were performed using Vector NTI Suite software (version 9.0; Thermo Fisher Scientific, Waltham, MA, USA).

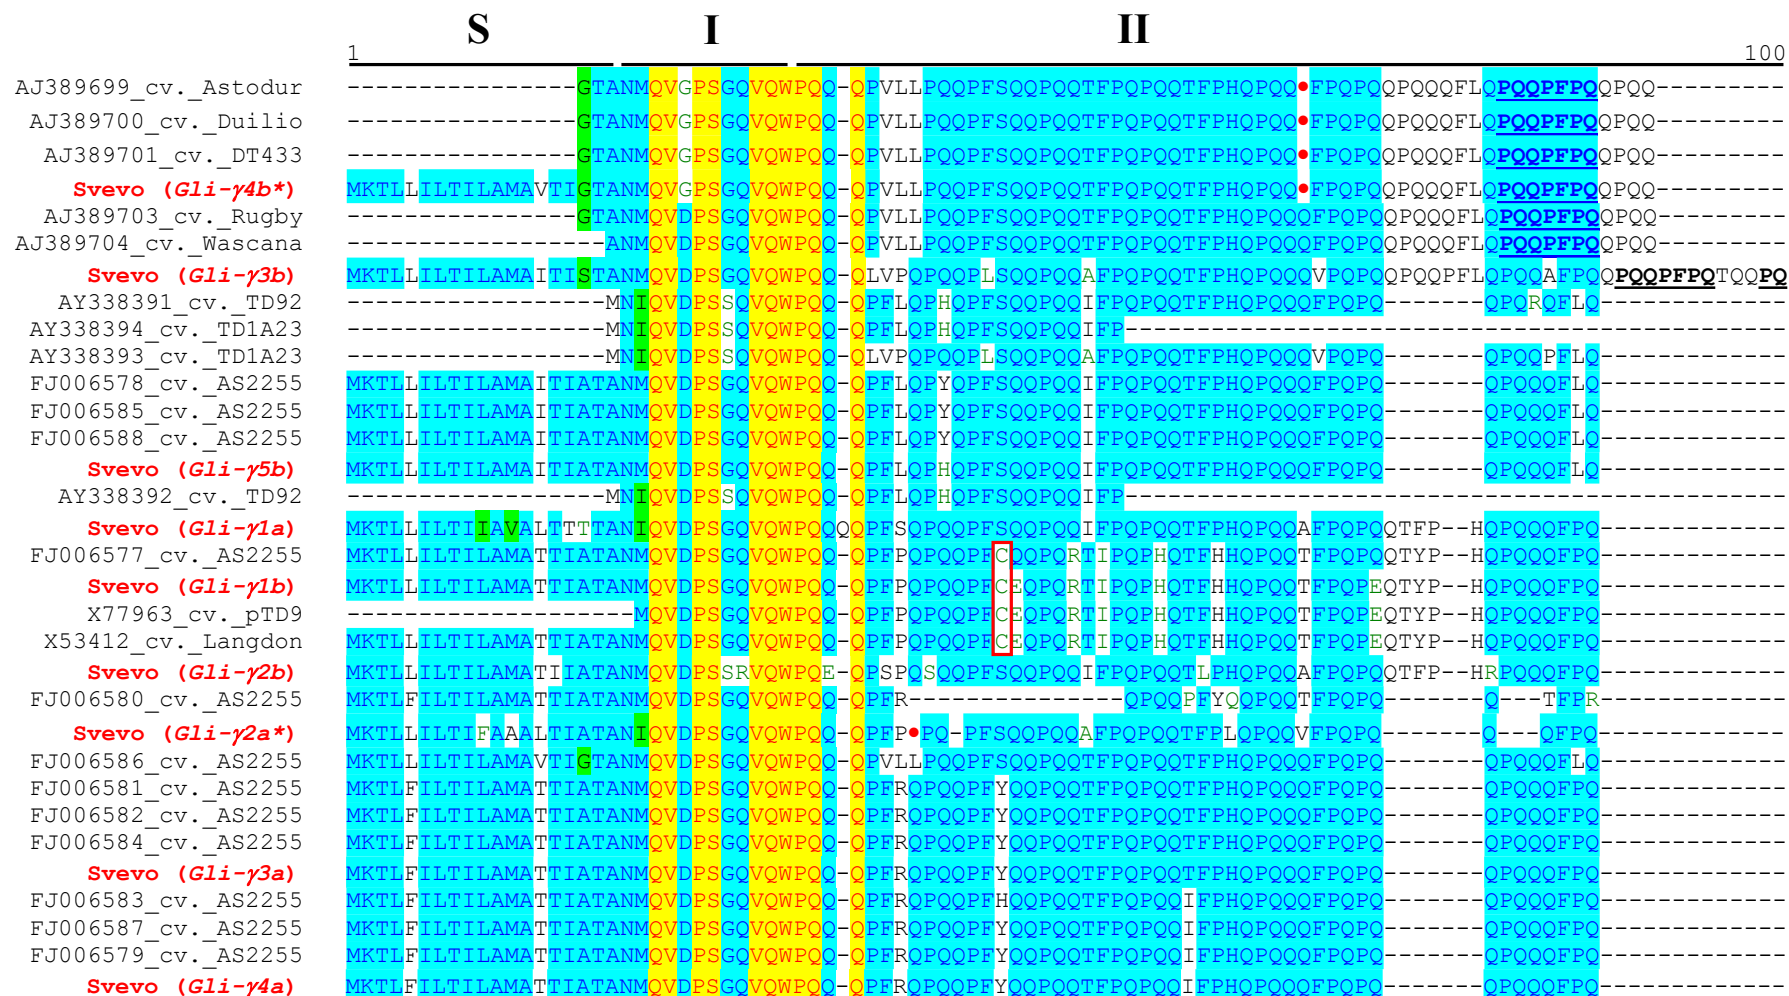

## 200

AJ389699\_cv.\_Astodur  
 AJ389700\_cv.\_Duilio  
 AJ389701\_cv.\_DT433  
**Svevo (Gli-γ4b\*)**  
 AJ389703\_cv.\_Rugby  
 AJ389704\_cv.\_Wascana  
**Svevo (Gli-γ3b)**  
 AY338391\_cv.\_TD92  
 AY338394\_cv.\_TD1A23  
 AY338393\_cv.\_TD1A23  
 FJ006578\_cv.\_AS2255  
 FJ006585\_cv.\_AS2255  
 FJ006588\_cv.\_AS2255  
**Svevo (Gli-γ5b)**  
 AY338392\_cv.\_TD92  
**Svevo (Gli-γ1a)**  
 FJ006577\_cv.\_AS2255  
**Svevo (Gli-γ1b)**  
 X77963\_cv.\_pTD9  
 X53412\_cv.\_Langdon  
**Svevo (Gli-γ2b)**  
 FJ006580\_cv.\_AS2255  
**Svevo (Gli-γ2a\*)**  
 FJ006586\_cv.\_AS2255  
 FJ006581\_cv.\_AS2255  
 FJ006582\_cv.\_AS2255  
 FJ006584\_cv.\_AS2255  
**Svevo (Gli-γ3a)**  
 FJ006583\_cv.\_AS2255  
 FJ006587\_cv.\_AS2255  
 FJ006579\_cv.\_AS2255  
**Svevo (Gli-γ4a)**

## IV

[illegible]

[illegible]
